# Supplementary material
Source: PubMed Central journal article supplement (PMC6239954)

A

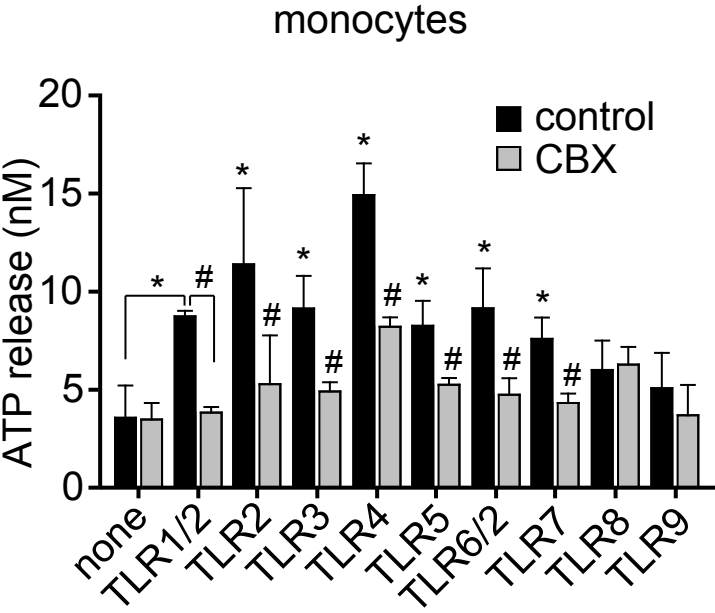

B

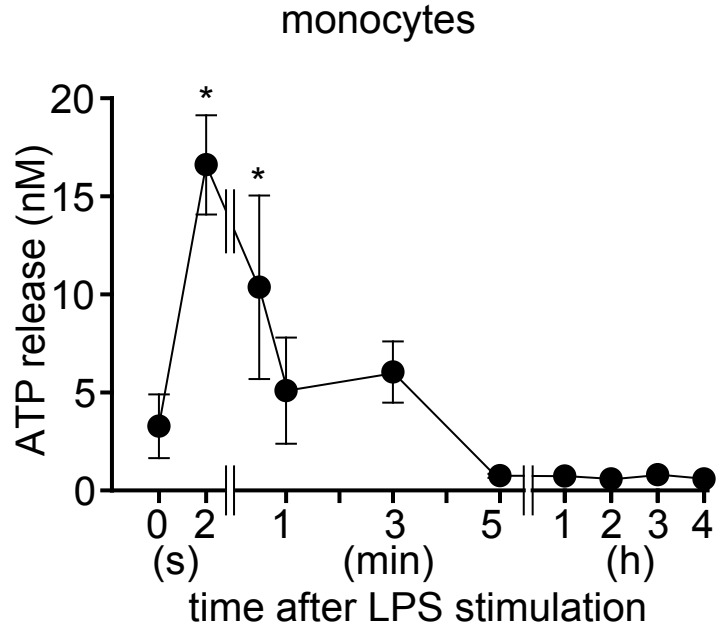

C

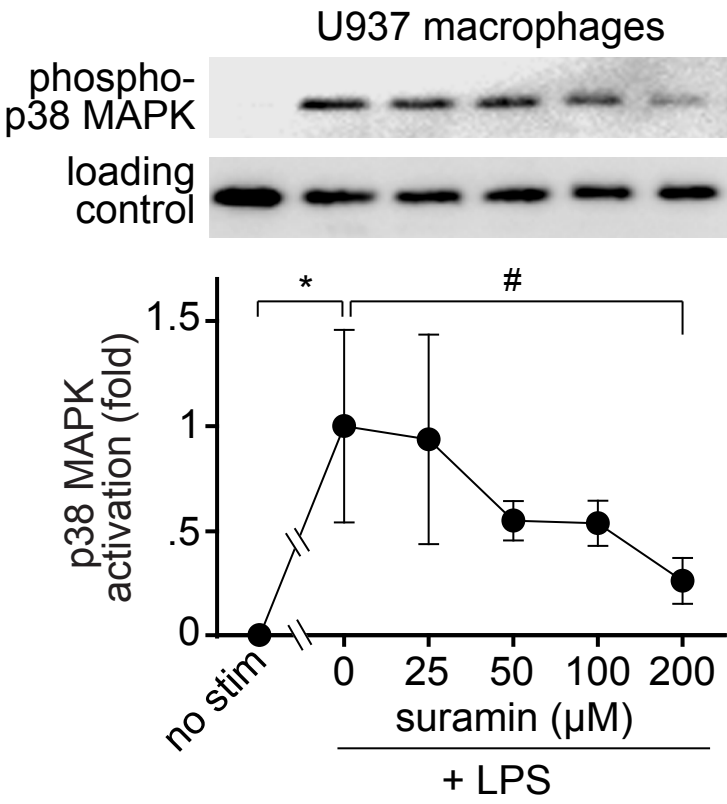

Supplement: NIHMS1504550-supplement-Supplemental_Digital_Content_2.pdf [file NIHMS1504550-supplement-Supplemental_Digital_Content_2.pdf]

# Supplemental Figure 2

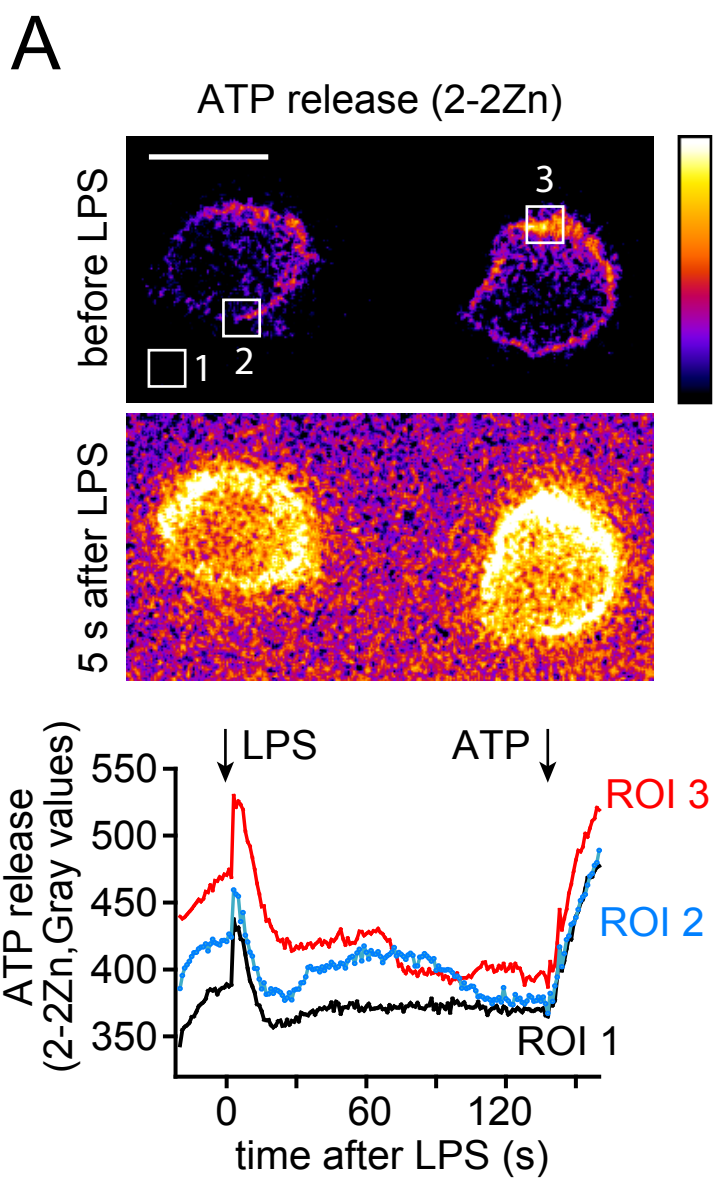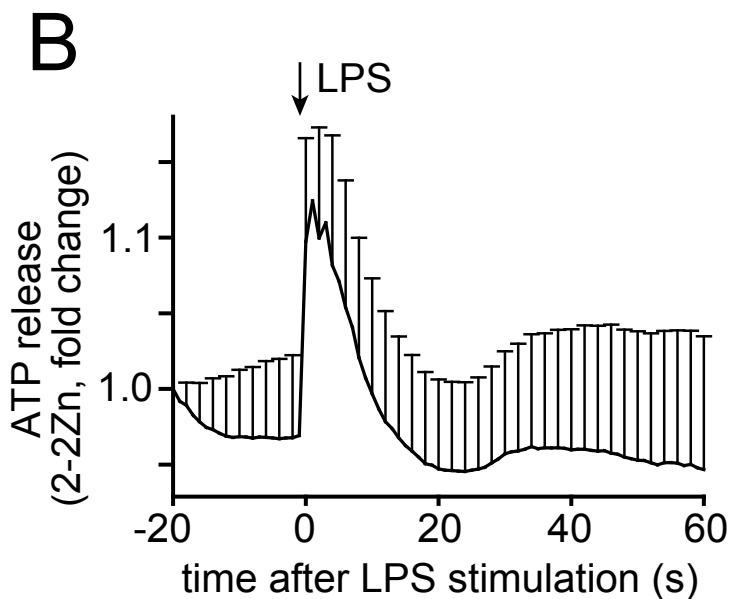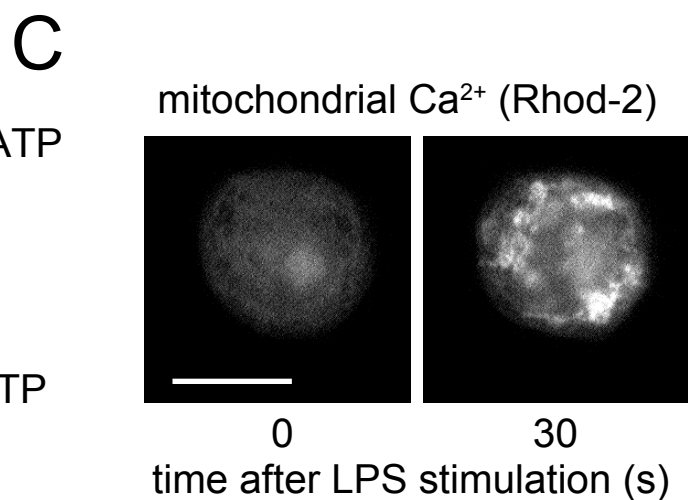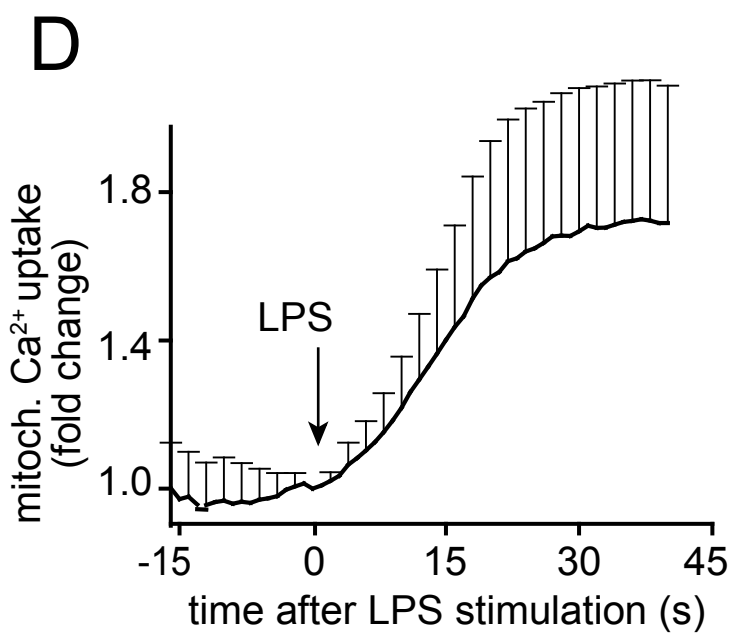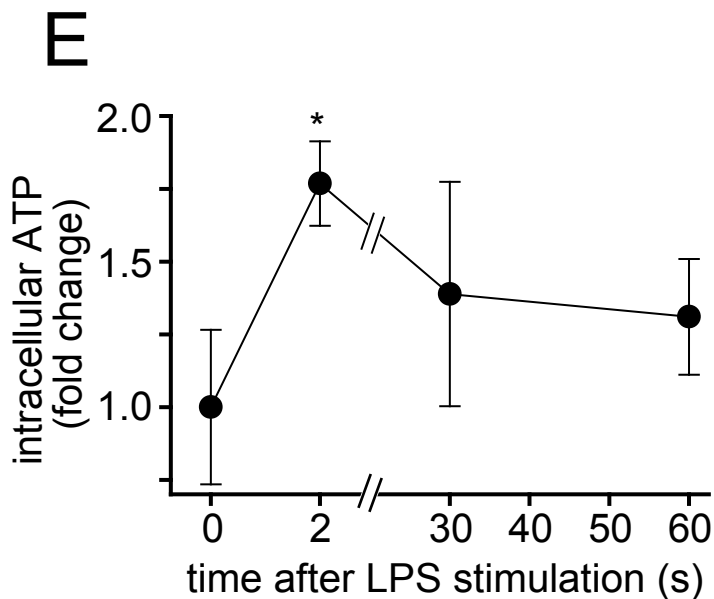

Supplement: NIHMS1504550-supplement-Supplemental_Digital_Content_3.pdf [file NIHMS1504550-supplement-Supplemental_Digital_Content_3.pdf]

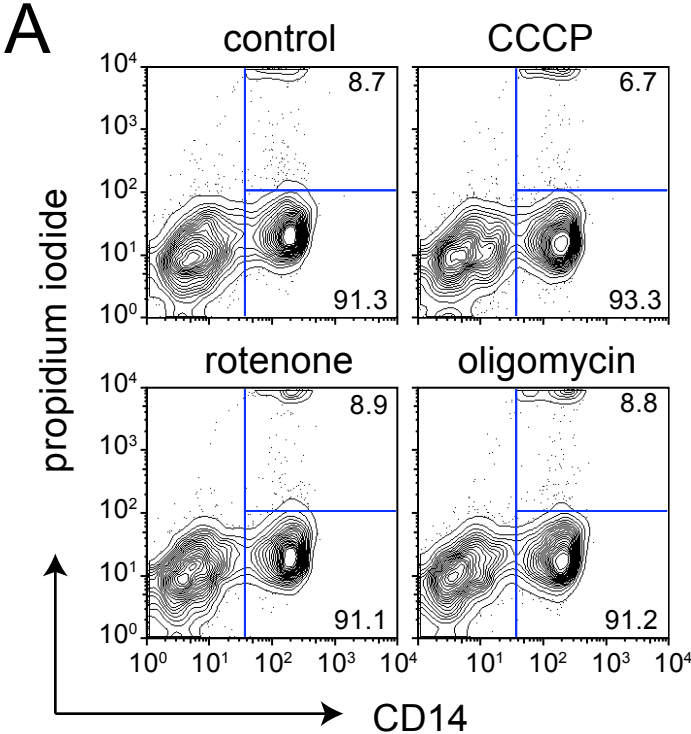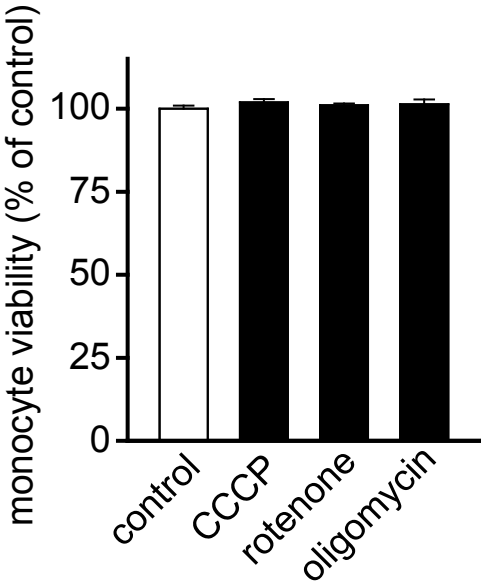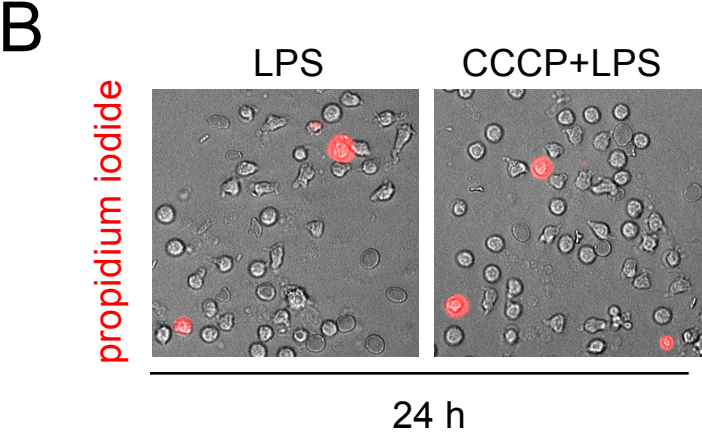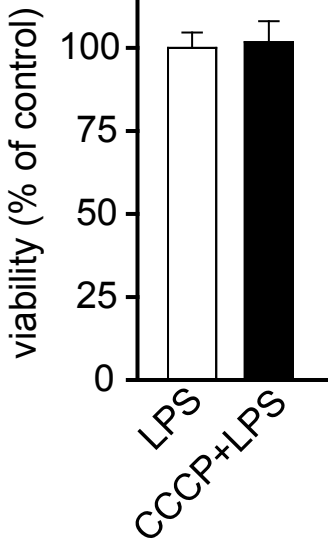

Supplement: NIHMS1504550-supplement-Supplemental_Digital_Content_4.pdf [file NIHMS1504550-supplement-Supplemental_Digital_Content_4.pdf]

# Supplemental Figure 4

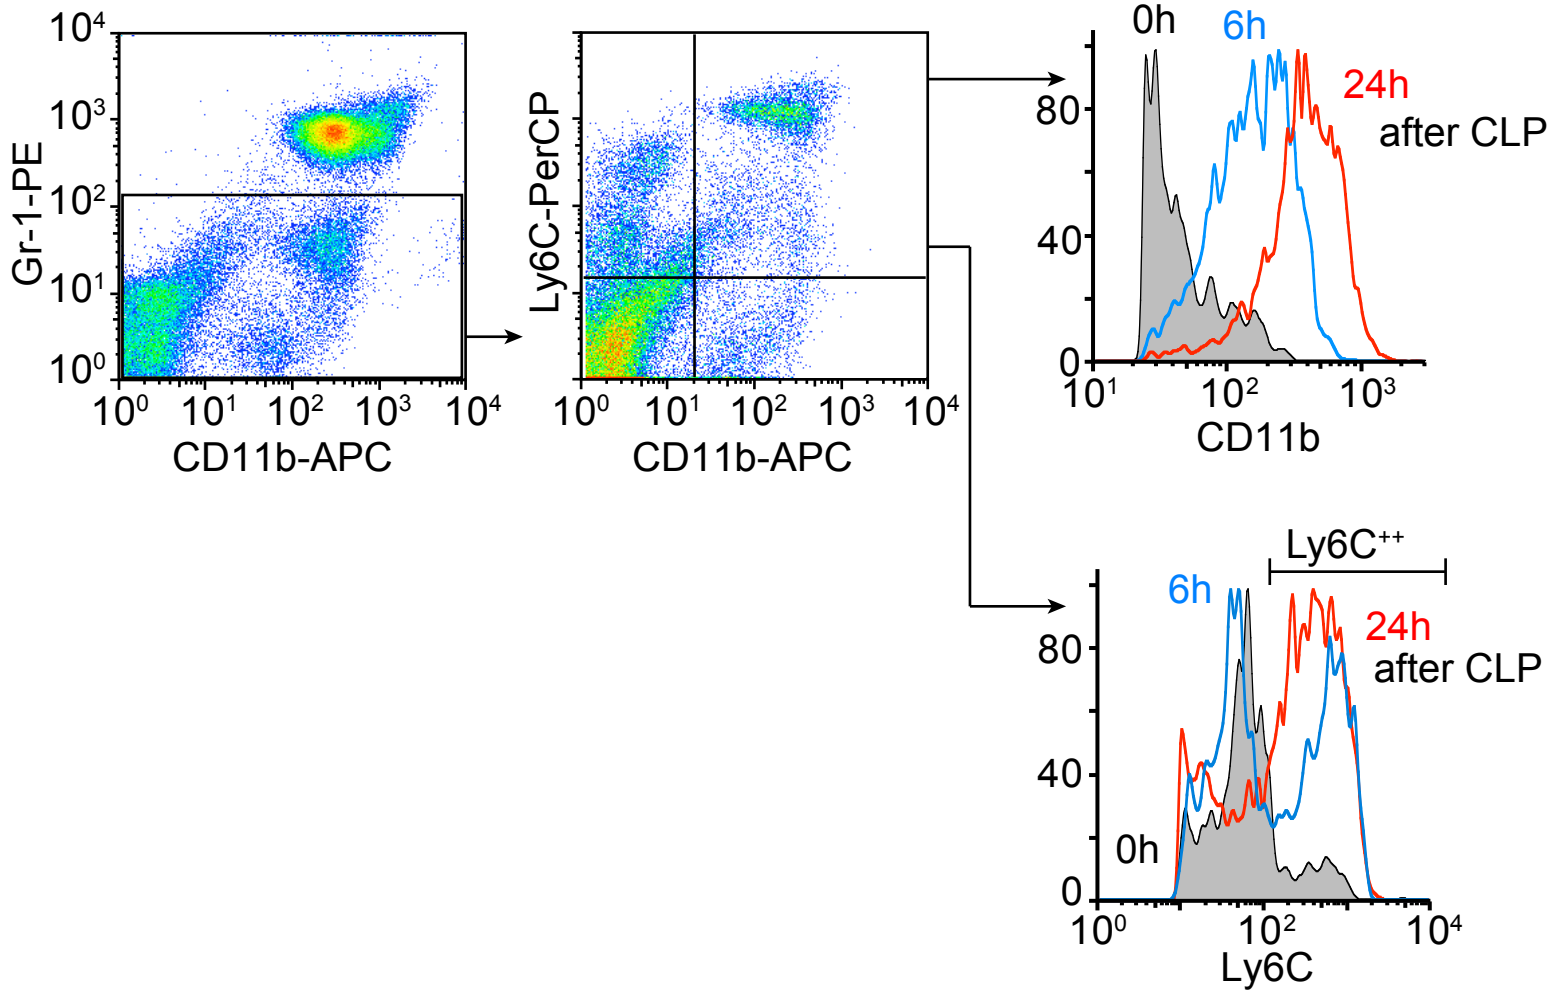

Supplement: NIHMS1504550-supplement-Supplemental_Digital_Content_5.pdf [file NIHMS1504550-supplement-Supplemental_Digital_Content_5.pdf]

Supplemental Figure 5

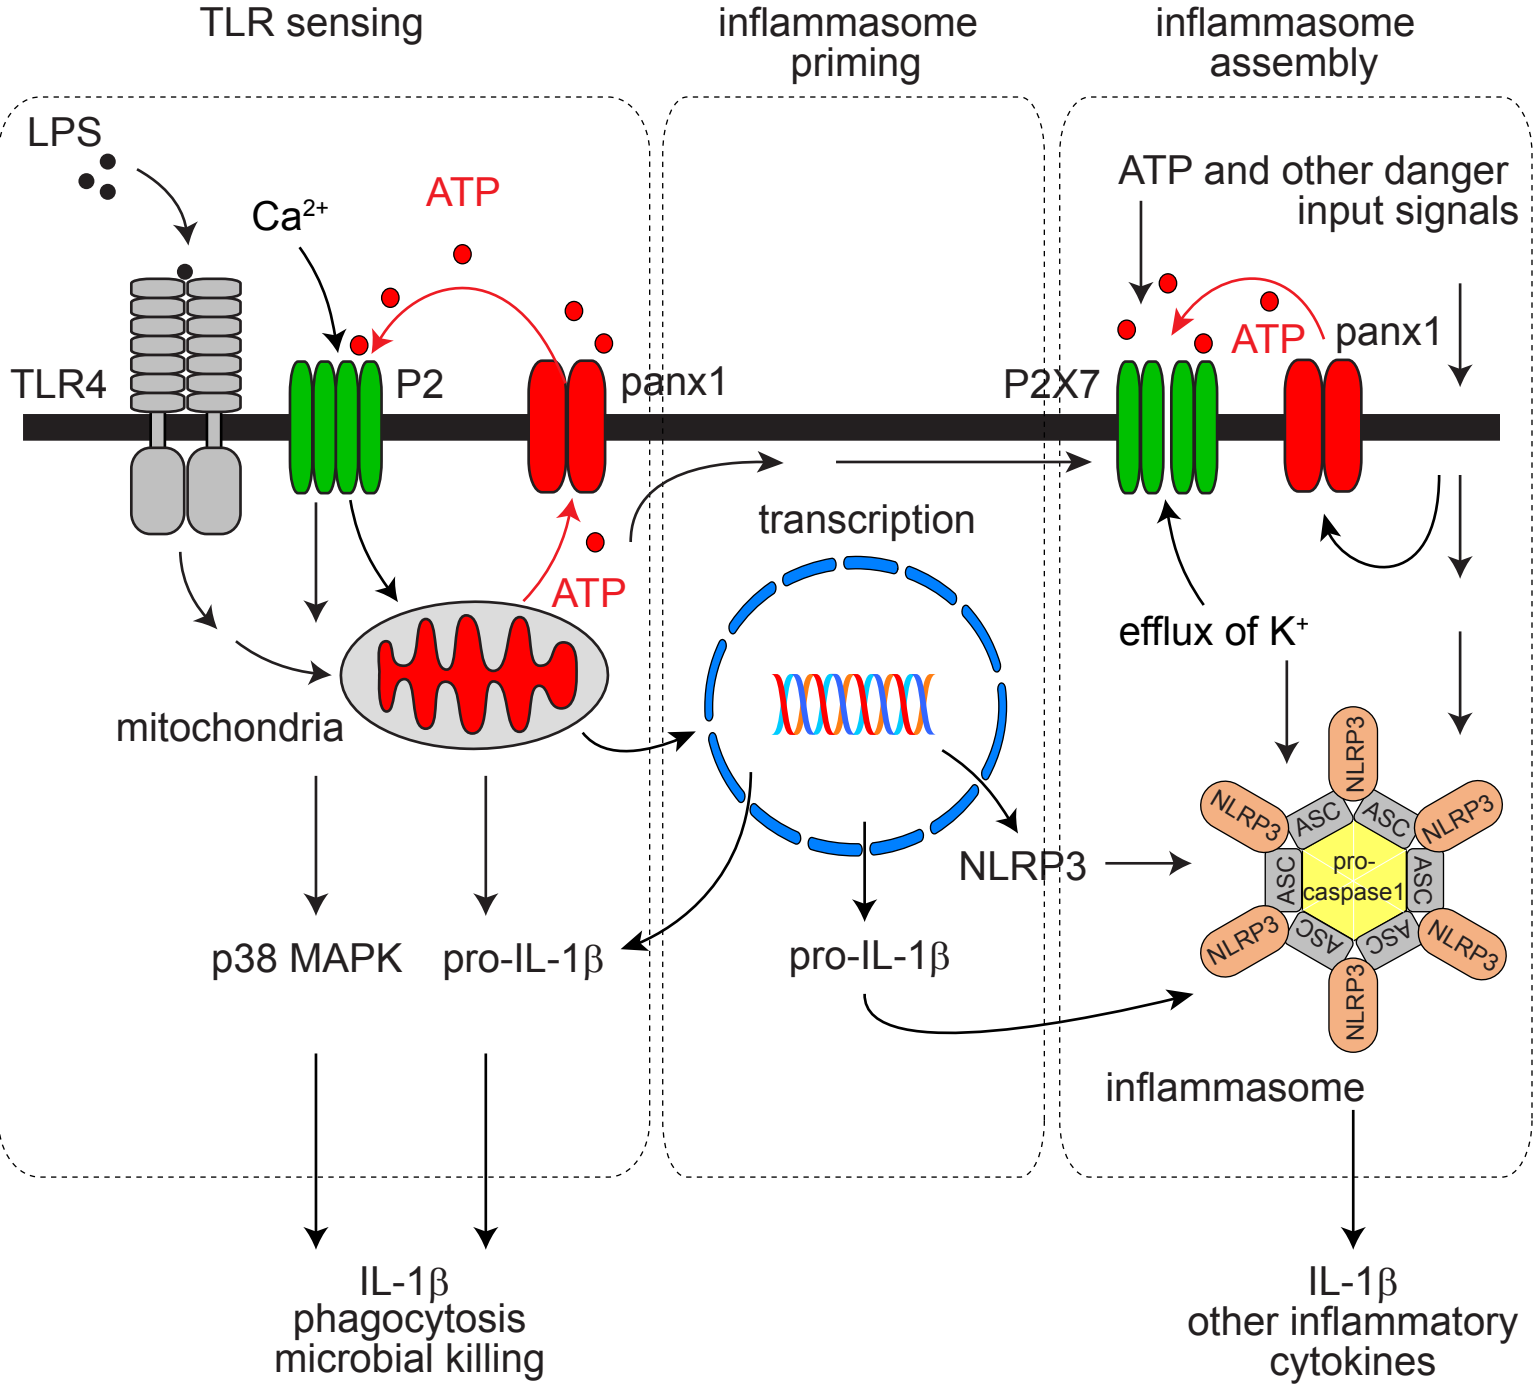

Supplement: NIHMS1504550-supplement-Supplemental_Digital_Content_6.pdf [file NIHMS1504550-supplement-Supplemental_Digital_Content_6.pdf]
